# Supplementary material for: Reduced FRG1 expression promotes prostate cancer progression and affects prostate cancer cell migration and invasion
Source: Springer Nature journal article supplement (doi:10.1186/s12885-019-5509-4), 2019-04-11
Supplement: MOESM1 [file 16650046]

**Table S1: Genes with list of primers for which expression was determined in DU145 and PC3 cells with altered FRG1 expression**

| <b>Gene</b> | <b>Primer 5'---- 3'</b> |
|-------------|-------------------------|
| MMP1 F      | AGAGCAGATGTGGACCATGC    |
| MMP1 R      | TTGTCCCGATGATCTCCCCT    |
| MMP2 F      | CGTCGCCCATCATCAAGTTC    |
| MMP2 R      | CAGGTATTGCACTGCCAACTC   |
| MMP3 F      | CACTCACAGACCTGACTCGG    |
| MMP3 R      | AGTCAGGGGGAGGTCCATAG    |
| MMP8 F      | AAGCCAGGAGGGGTAGAGTT    |
| MMP8 R      | TTTTCCAGGTAGTCCTGAACAGT |
| MMP9 F      | TTCAGGGAGACGCCCATTTTC   |
| MMP9 R      | AACCGAGTTGGAACCACGAC    |
| MMP10 F     | AGTTTGGCTCATGCCTACCC    |
| MMP10 R     | TTGGTGCCTGATGCATCTTCT   |
| MMP13 F     | GTTTGCAGAGCGCTACCTGA    |
| MMP13 R     | GACTGCATTTCTCGGAGCCT    |
| FGF2 F      | GCTGTACTGCAAAAACGGGG    |
| FGF2 R      | TAGCTTGATGTGAGGGTCCG    |
| PLGF F      | CCATGCAGCTCCTAAAGATCC   |
| PLGF R      | TCCTCCTTTCCGGCTTCA      |
| CXCL1 F     | AACCGAAGTCATAGCCACAC    |
| CXCL1 R     | GTTGGATTTGTCAGTGTTCAGC  |
| CXCL8 F     | ACCGGAAGGAACCATCTCAC    |
| CXCL8 R     | GGCAAAACTGCACCTTCACAC   |
| IL 10 F     | AAGACCCAGACATCAAGGCG    |
| IL 10 R     | AATCGATGACAGCGCCGTAG    |
| PDGFA F     | GCCAACCAGATGTGAGGTGA    |
| PDGFA R     | GGAGGAGAACAAGACCGCA     |
| PDGFB F     | ACCTGCGTCTGGTCAGC       |
| PDGFB R     | ATCTTCCTCTCCGGGGTCTC    |
| GM-CSF F    | CTGGAGCTGTACAAGCAGGG    |
| GM-CSF R    | ACAGGAAGTTTCCGGGGTTG    |
| G-CSF F     | AGCAAGTGAGGAAGATCCAGG   |
| G-CSF R     | TTGTAGGTGGCACACTCACTC   |
| VEGFA-F     | ATCTGCATGGTGATGTTGGA    |
| VEGFA-R     | GGGCAGAATCATCACGAAGT    |
| TGF-beta-F  | GCAACAATTCTGGCGATACC    |
| TGF-beta-R  | AAAGCCTCAATTTCCCCTCC    |
