# Supplementary material for: Reduced FRG1 expression promotes prostate cancer progression and affects prostate cancer cell migration and invasion
Source: Springer Nature journal article supplement (doi:10.1186/s12885-019-5509-4), 2019-04-11
Supplement: MOESM2 [file 16650046]

**Table S2:** Prostate cancer cohort used for IHC analysis of FRG1 expression.

| <b>S. No.</b> | <b>Age Range* (years)</b> | <b>Organ/Anatomic Site</b> | <b>Pathology diagnosis</b> | <b>Type</b> | <b>Gleason Score</b> |
|---------------|---------------------------|----------------------------|----------------------------|-------------|----------------------|
| 1             | 71 or over                | Prostate                   | Adenocarcinoma             | Malignant   | 2+3=5                |
| 2             | 71 or over                | Prostate                   | Adenocarcinoma             | Malignant   | 3+2=5                |
| 3             | 61-70                     | Prostate                   | Adenocarcinoma             | Malignant   | 3+3=6                |
| 4             | 71 or over                | Prostate                   | Adenocarcinoma             | Malignant   | 3+3=6                |
| 5             | 71 or over                | Prostate                   | Adenocarcinoma             | Malignant   | 3+3=6                |
| 6             | 71 or over                | Prostate                   | Adenocarcinoma             | Malignant   | 3+3=6                |
| 7             | 61-70                     | Prostate                   | Adenocarcinoma             | Malignant   | 3+3=6                |
| 8             | 71 or over                | Prostate                   | Adenocarcinoma             | Malignant   | 3+3=6                |
| 9             | 71 or over                | Prostate                   | Adenocarcinoma             | Malignant   | 3+3=6                |
| 10            | 71 or over                | Prostate                   | Adenocarcinoma             | Malignant   | 3+3=6                |
| 11            | 71 or over                | Prostate                   | Adenocarcinoma             | Malignant   | 3+3=6                |
| 12            | 61-70                     | Prostate                   | Adenocarcinoma             | Malignant   | 3+3=6                |
| 13            | 61-70                     | Prostate                   | Adenocarcinoma             | Malignant   | 3+3=6                |
| 14            | 61-70                     | Prostate                   | Adenocarcinoma             | Malignant   | 3+3=6                |
| 15            | 71 or over                | Prostate                   | Adenocarcinoma             | Malignant   | 3+3=6                |
| 16            | 61-70                     | Prostate                   | Adenocarcinoma             | Malignant   | 3+3=6                |
| 17            | 71 or over                | Prostate                   | Adenocarcinoma             | Malignant   | 3+3=6                |
| 18            | 61-70                     | Prostate                   | Adenocarcinoma             | Malignant   | 3+3=6                |
| 19            | 71 or over                | Prostate                   | Adenocarcinoma             | Malignant   | 3+3=6                |
| 20            | 71 or over                | Prostate                   | Adenocarcinoma             | Malignant   | 3+3=6                |
| 21            | 71 or over                | Prostate                   | Adenocarcinoma             | Malignant   | 3+3=6                |
| 22            | 71 or over                | Prostate                   | Adenocarcinoma             | Malignant   | 3+3=6                |
| 23            | 61-70                     | Prostate                   | Adenocarcinoma             | Malignant   | 3+3=6                |
| 24            | 71 or over                | Prostate                   | Adenocarcinoma             | Malignant   | 3+3=6                |
| 25            | 61-70                     | Prostate                   | Adenocarcinoma             | Malignant   | 3+3=6                |
| 26            | 71 or over                | Prostate                   | Adenocarcinoma             | Malignant   | 3+3=6                |
| 27            | 71 or over                | Prostate                   | Adenocarcinoma             | Malignant   | 3+3=6                |
| 28            | 61-70                     | Prostate                   | Adenocarcinoma             | Malignant   | 3+3=6                |
| 29            | 61-70                     | Prostate                   | Adenocarcinoma             | Malignant   | 3+3=6                |
| 30            | 71 or over                | Prostate                   | Adenocarcinoma             | Malignant   | 3+4=7                |
| 31            | 71 or over                | Prostate                   | Adenocarcinoma             | Malignant   | 3+4=7                |
| 32            | 71 or over                | Prostate                   | Adenocarcinoma             | Malignant   | 3+4=7                |
| 33            | 61-70                     | Prostate                   | Adenocarcinoma             | Malignant   | 3+4=7                |
| 34            | 61-70                     | Prostate                   | Adenocarcinoma             | Malignant   | 3+4=7                |
| 35            | 51-60                     | Prostate                   | Adenocarcinoma             | Malignant   | 3+4=7                |
| 36            | 51-60                     | Prostate                   | Adenocarcinoma             | Malignant   | 3+4=7                |
| 37            | 71 or over                | Prostate                   | Adenocarcinoma             | Malignant   | 3+4=7                |
| 38            | 71 or over                | Prostate                   | Adenocarcinoma             | Malignant   | 3+4=7                |
| 39            | 61-70                     | Prostate                   | Adenocarcinoma             | Malignant   | 3+4=7                |
| 40            | 61-70                     | Prostate                   | Adenocarcinoma             | Malignant   | 3+4=7                |
| 41            | 61-70                     | Prostate                   | Adenocarcinoma             | Malignant   | 3+4=7                |
| 42            | 71 or over                | Prostate                   | Adenocarcinoma             | Malignant   | 3+4=7                |
| 43            | 71 or over                | Prostate                   | Adenocarcinoma             | Malignant   | 3+4=7                |
| 44            | 51-60                     | Prostate                   | Adenocarcinoma             | Malignant   | 3+4=7                |
| 45            | 71 or over                | Prostate                   | Adenocarcinoma             | Malignant   | 3+4=7                |
| 46            | 61-70                     | Prostate                   | Adenocarcinoma             | Malignant   | 3+4=7                |
| 47            | 71 or over                | Prostate                   | Adenocarcinoma             | Malignant   | 3+4=7                |
| 48            | 61-70                     | Prostate                   | Adenocarcinoma             | Malignant   | 3+5=8                |
| 49            | 61-70                     | Prostate                   | Adenocarcinoma             | Malignant   | 3+5=8                |
| 50            | 71 or over                | Prostate                   | Adenocarcinoma             | Malignant   | 3+5=8                |

|     |               |          |                |           |        |
|-----|---------------|----------|----------------|-----------|--------|
| 51  | 61-70         | Prostate | Adenocarcinoma | Malignant | 4+3=7  |
| 52  | 71 or over    | Prostate | Adenocarcinoma | Malignant | 4+3=7  |
| 53  | 61-70         | Prostate | Adenocarcinoma | Malignant | 4+3=7  |
| 54  | 51-60         | Prostate | Adenocarcinoma | Malignant | 4+3=7  |
| 55  | 61-70         | Prostate | Adenocarcinoma | Malignant | 4+3=7  |
| 56  | 71 or over    | Prostate | Adenocarcinoma | Malignant | 4+3=7  |
| 57  | 51-60         | Prostate | Adenocarcinoma | Malignant | 4+3=7  |
| 58  | 71 or over    | Prostate | Adenocarcinoma | Malignant | 4+3=7  |
| 59  | 61-70         | Prostate | Adenocarcinoma | Malignant | 4+3=7  |
| 60  | 61-70         | Prostate | Adenocarcinoma | Malignant | 4+3=7  |
| 61  | 61-70         | Prostate | Adenocarcinoma | Malignant | 4+3=7  |
| 62  | 61-70         | Prostate | Adenocarcinoma | Malignant | 4+3=7  |
| 63  | 71 or over    | Prostate | Adenocarcinoma | Malignant | 4+3=7  |
| 64  | 61-70         | Prostate | Adenocarcinoma | Malignant | 4+3=7  |
| 65  | 61-70         | Prostate | Adenocarcinoma | Malignant | 4+3=7  |
| 66  | 71 or over    | Prostate | Adenocarcinoma | Malignant | 4+3=7  |
| 67  | 61-70         | Prostate | Adenocarcinoma | Malignant | 4+4=8  |
| 68  | 61-70         | Prostate | Adenocarcinoma | Malignant | 4+4=8  |
| 69  | 71 or over    | Prostate | Adenocarcinoma | Malignant | 4+4=8  |
| 70  | 71 or over    | Prostate | Adenocarcinoma | Malignant | 4+4=8  |
| 71  | 61-70         | Prostate | Adenocarcinoma | Malignant | 4+4=8  |
| 72  | 51-60         | Prostate | Adenocarcinoma | Malignant | 4+4=8  |
| 73  | 61-70         | Prostate | Adenocarcinoma | Malignant | 4+4=8  |
| 74  | 51-60         | Prostate | Adenocarcinoma | Malignant | 4+4=8  |
| 75  | 71 or over    | Prostate | Adenocarcinoma | Malignant | 4+4=8  |
| 76  | 61-70         | Prostate | Adenocarcinoma | Malignant | 4+4=8  |
| 77  | 61-70         | Prostate | Adenocarcinoma | Malignant | 4+5=9  |
| 78  | 51-60         | Prostate | Adenocarcinoma | Malignant | 4+5=9  |
| 79  | 71 or over    | Prostate | Adenocarcinoma | Malignant | 4+5=9  |
| 80  | 71 or over    | Prostate | Adenocarcinoma | Malignant | 4+5=9  |
| 81  | 71 or over    | Prostate | Adenocarcinoma | Malignant | 4+5=9  |
| 82  | 71 or over    | Prostate | Adenocarcinoma | Malignant | 4+5=9  |
| 83  | 61-70         | Prostate | Adenocarcinoma | Malignant | 5+4=9  |
| 84  | 71 or over    | Prostate | Adenocarcinoma | Malignant | 5+4=9  |
| 85  | 61-70         | Prostate | Adenocarcinoma | Malignant | 5+4=9  |
| 86  | 71 or over    | Prostate | Adenocarcinoma | Malignant | 5+4=9  |
| 87  | 61-70         | Prostate | Adenocarcinoma | Malignant | 5+4=9  |
| 88  | 71 or over    | Prostate | Adenocarcinoma | Malignant | 5+4=9  |
| 89  | 71 or over    | Prostate | Adenocarcinoma | Malignant | 5+4=9  |
| 90  | 61-70         | Prostate | Adenocarcinoma | Malignant | 5+5=10 |
| 91  | Not Available | Prostate | Adenocarcinoma | Malignant | 4+4=8  |
| 92  | Not Available | Prostate | Adenocarcinoma | Malignant | 5+4=9  |
| 93  | Not Available | Prostate | Adenocarcinoma | Malignant | 4+4=8  |
| 94  | Not Available | Prostate | Adenocarcinoma | Malignant | 3+3=6  |
| 95  | Not Available | Prostate | Adenocarcinoma | Malignant | 3+3=6  |
| 96  | Not Available | Prostate | Adenocarcinoma | Malignant | 5+5=10 |
| 97  | Not Available | Prostate | Adenocarcinoma | Malignant | 3+4=7  |
| 98  | Not Available | Prostate | Adenocarcinoma | Malignant | 5+4=9  |
| 99  | Not Available | Prostate | Adenocarcinoma | Malignant | 5+5=10 |
| 100 | Not Available | Prostate | Adenocarcinoma | Malignant | 4+4=8  |

\* Age range 51-60, 61- 70, 71 or over
