# Supplementary material for: Reduced FRG1 expression promotes prostate cancer progression and affects prostate cancer cell migration and invasion
Source: Springer Nature journal article supplement (doi:10.1186/s12885-019-5509-4), 2019-04-11
Supplement: MOESM3 [file 16650046]

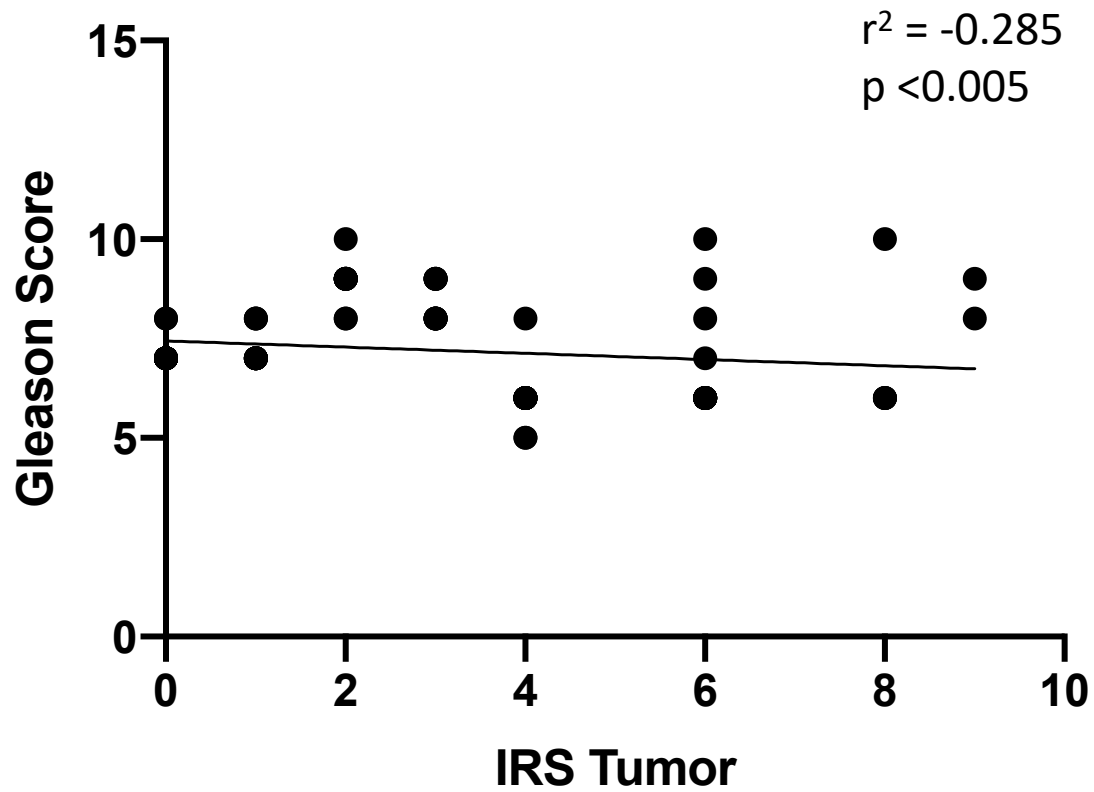

Graphical Representation of Correlation analysis between Tumor IRS for FRG1 and Gleason Score

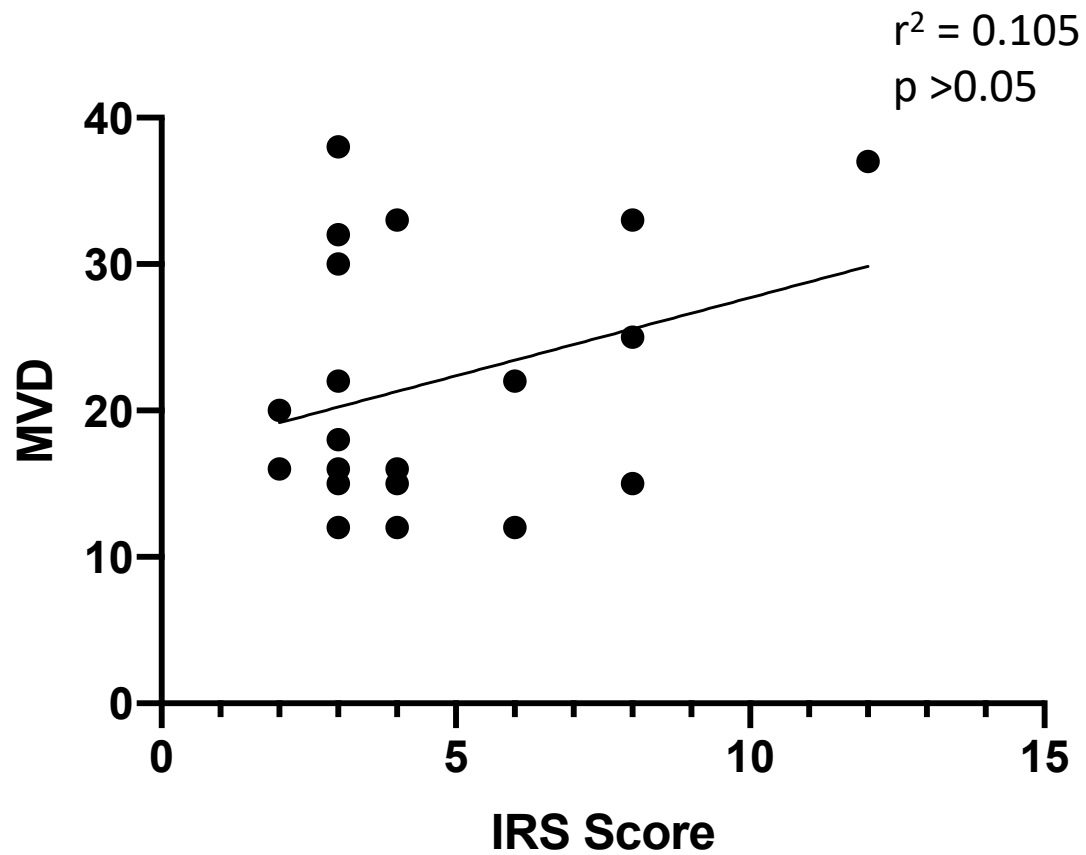

Graphical Representation of Correlation analysis between IRS and MVD count
