# Supplementary material for: Reduced FRG1 expression promotes prostate cancer progression and affects prostate cancer cell migration and invasion
Source: Springer Nature journal article supplement (doi:10.1186/s12885-019-5509-4), 2019-04-11
Supplement: MOESM4 [file 16650046]

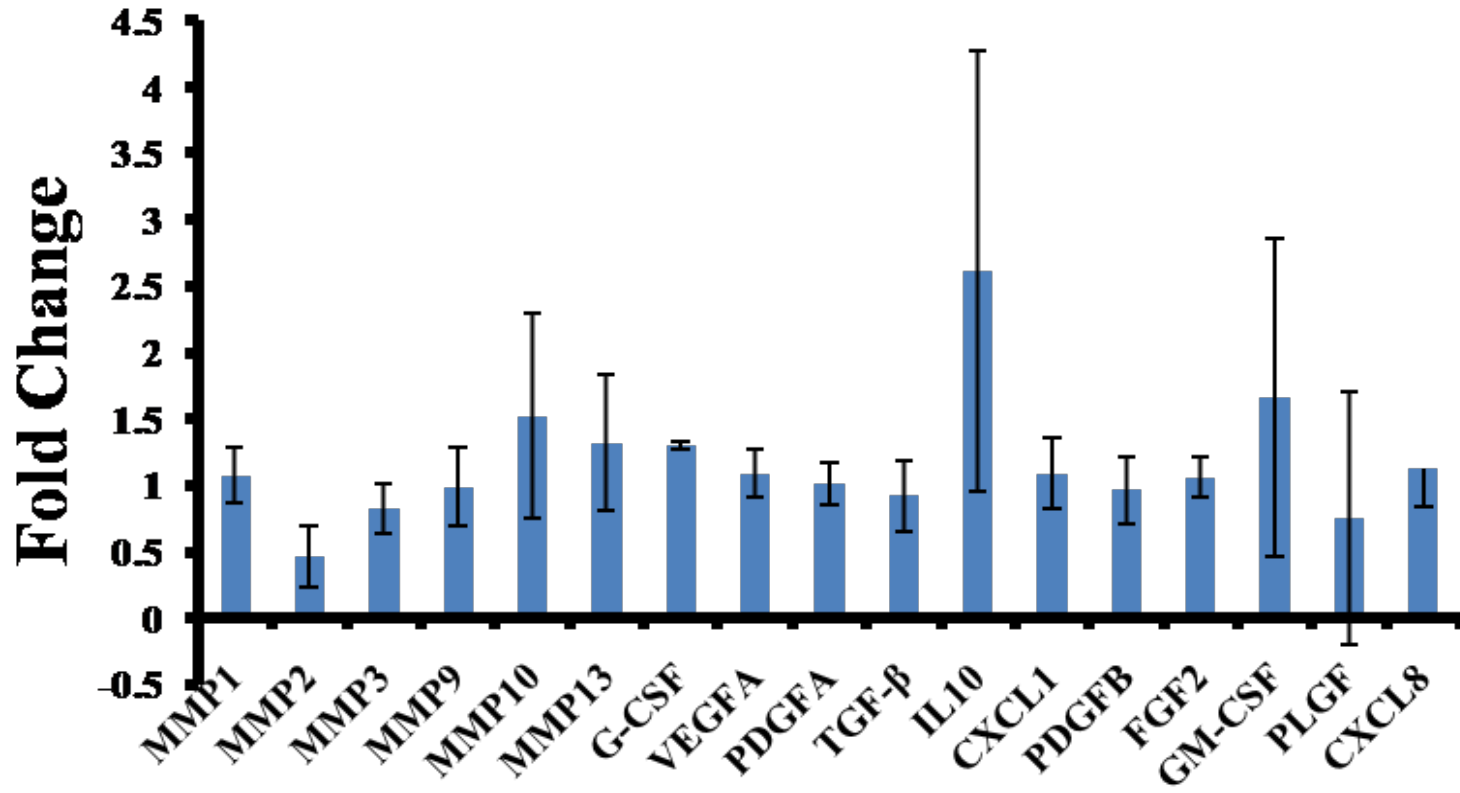

q-RT PCR based analysis of gene expression in DU145 cells with ectopic expression of FRG1, compared to empty vector control. X-axis shows the names of genes analyzed and Y-axis shows fold change.

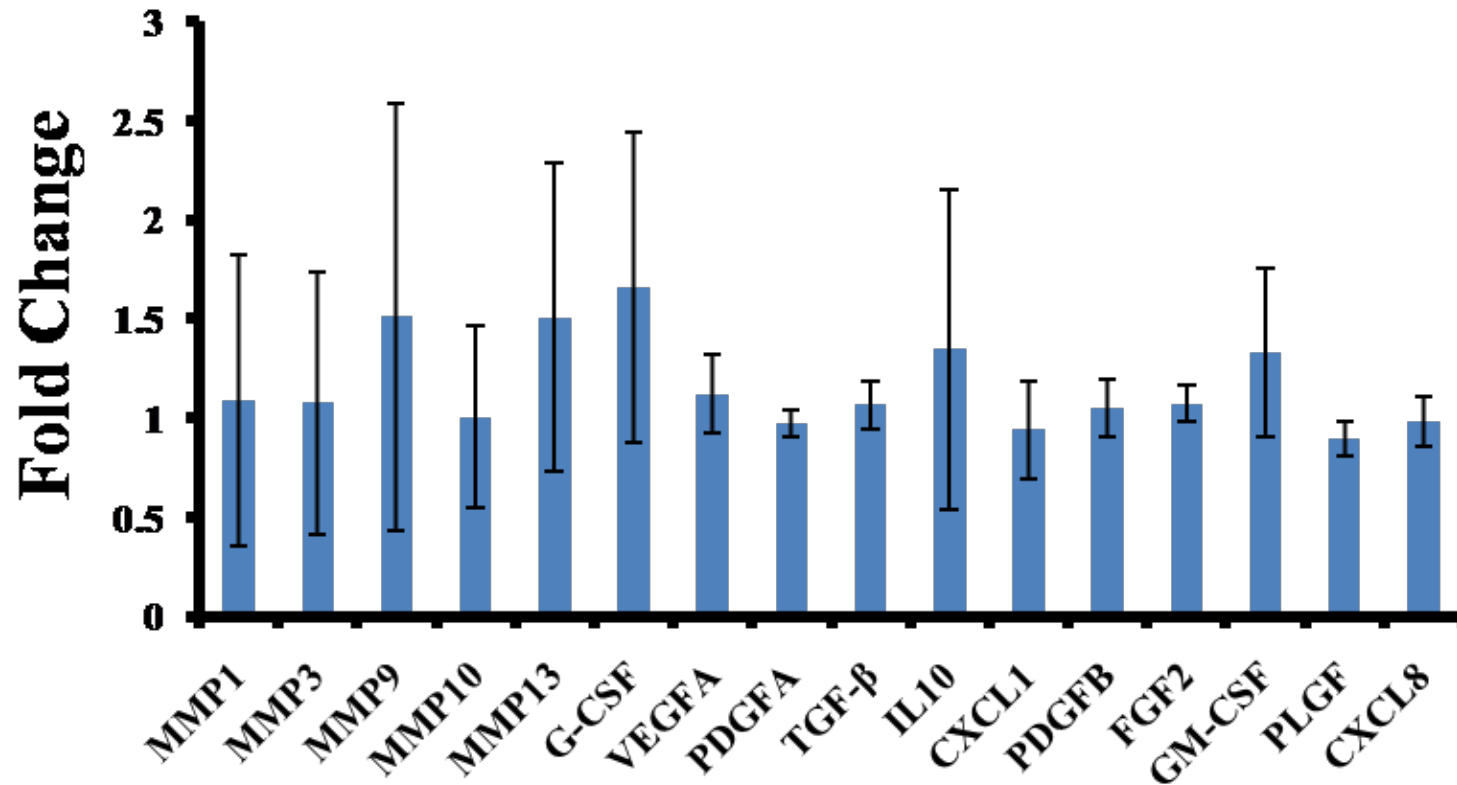

q-RT PCR based analysis of gene expression in PC3 cells with ectopic expression of FRG1, compared to empty vector control. X-axis shows the names of genes analyzed and Y-axis shows fold change.
